# Supplementary material
Source: Springer Nature journal article supplement (https://www.springermedizin.de/resource/supplementary/12958_2011_813_MOESM4_ESM.pdf/9568912)

**A**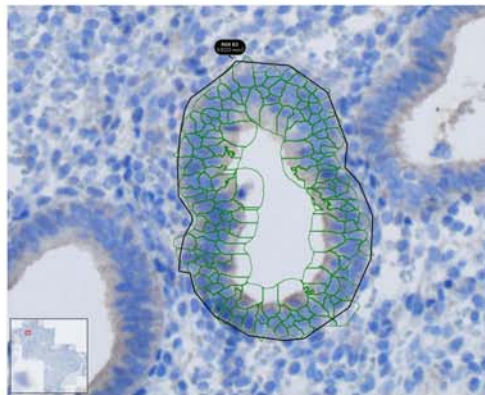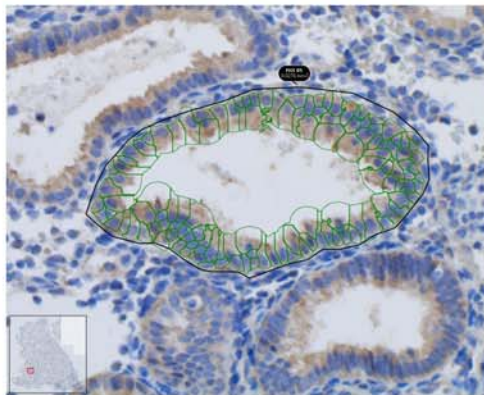**B**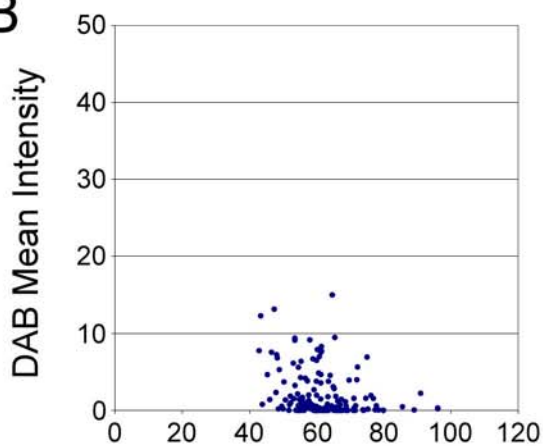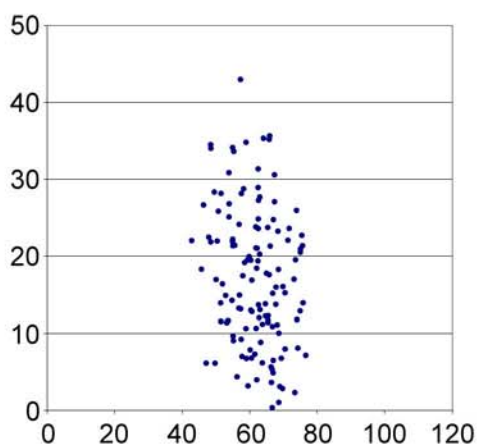

Hematoxyline Mean Intensity

**C**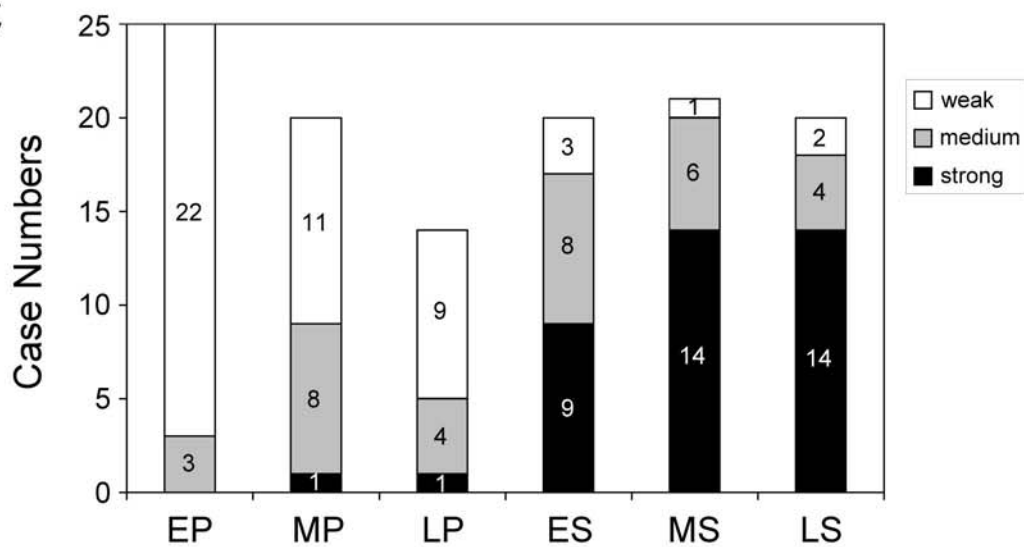

Supplement: MOESM4 [file 9568912]
